# Supplementary material for: New 3-D polyoxovanadoborate architectures based on [V12B18O60]16− clusters
Source: Royal Society of Chemistry journal article supplement (doi:10.1039/c3ce40428e), 2013-01-01
Supplement: c3ce40428e.pdf [file c3ce40428e.pdf]

Supporting Information for

**New 3-D polyoxovanadoborate architectures based on  $[V_{12}B_{18}O_{60}]^{16-}$  clusters**

Jian Zhou,\* Xing Liu, Rong Chen, Hong-Ping Xiao, Feilong Hu, Huahong Zou, Yun Zhou, Chun

Liu, and Ligang Zhu

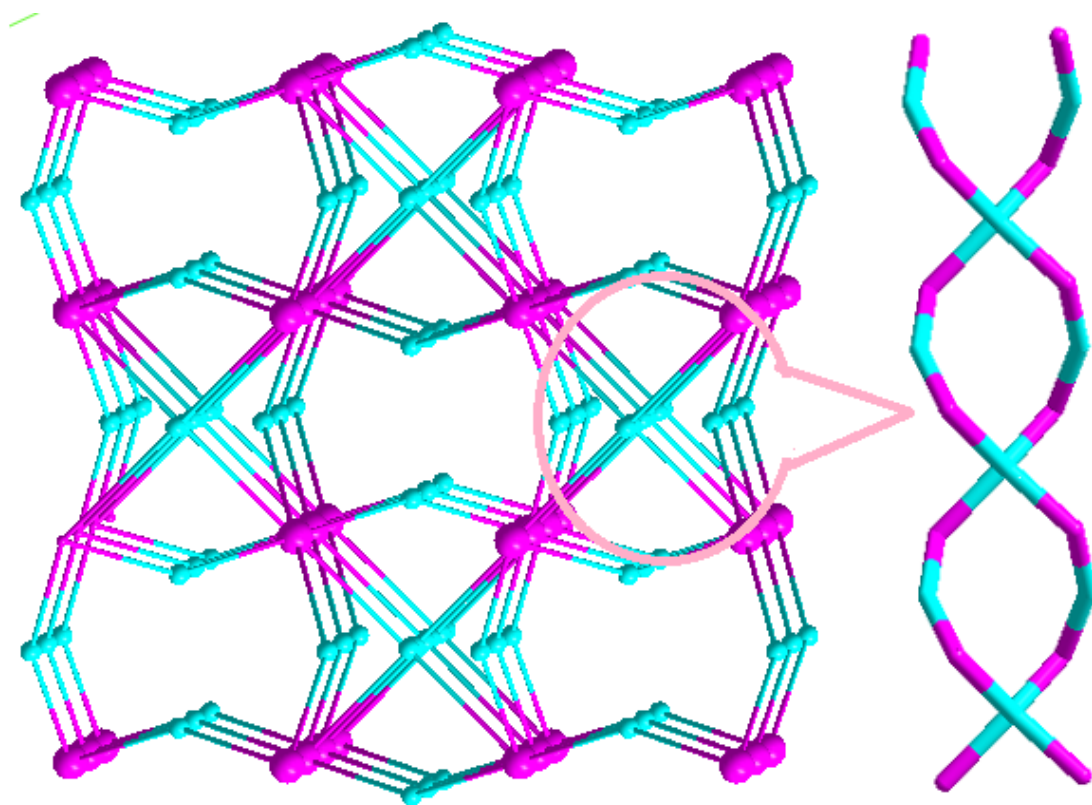

Fig. S1 View of the 3-D simplified framework of **2**, showing the helical channels.



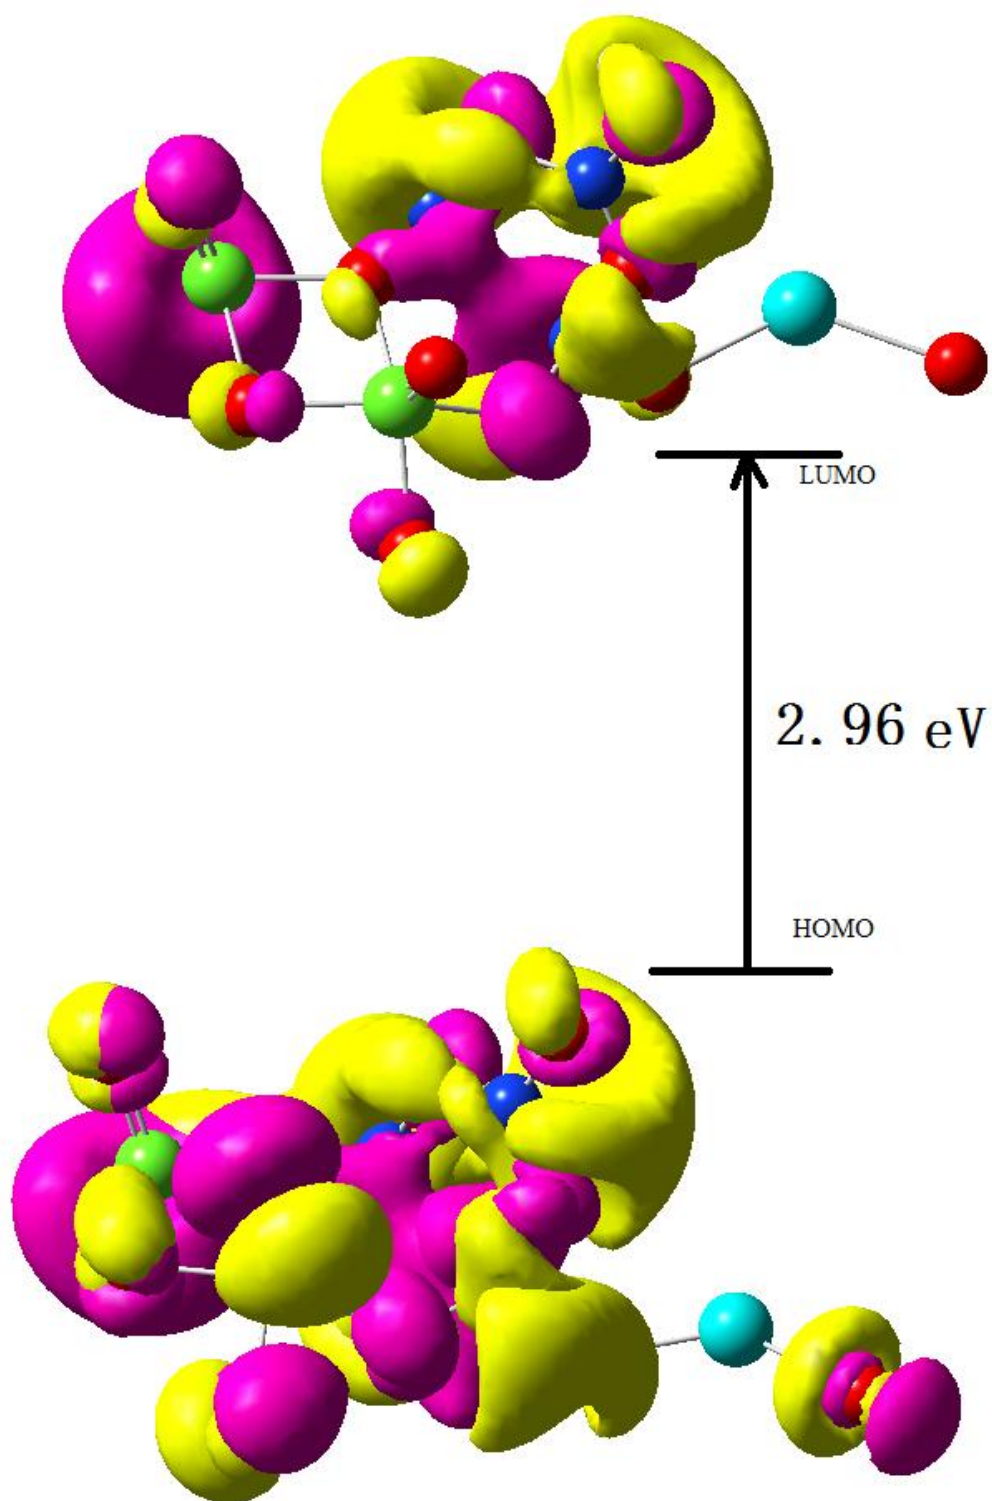

Fig. S4 Contour plots and orbital gaps of frontier orbital for [CdB<sub>3</sub>V<sub>2</sub>O<sub>11</sub>]  
species.

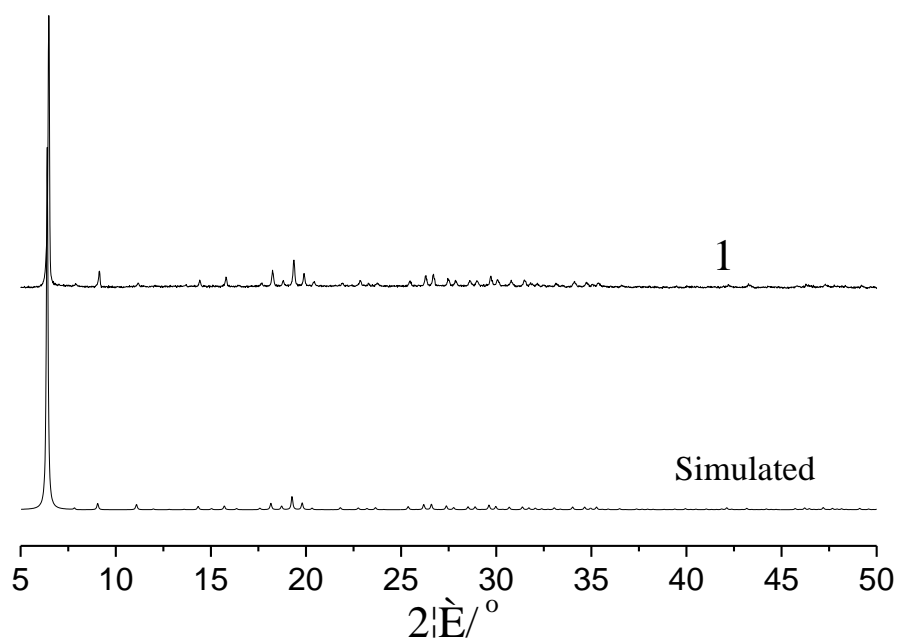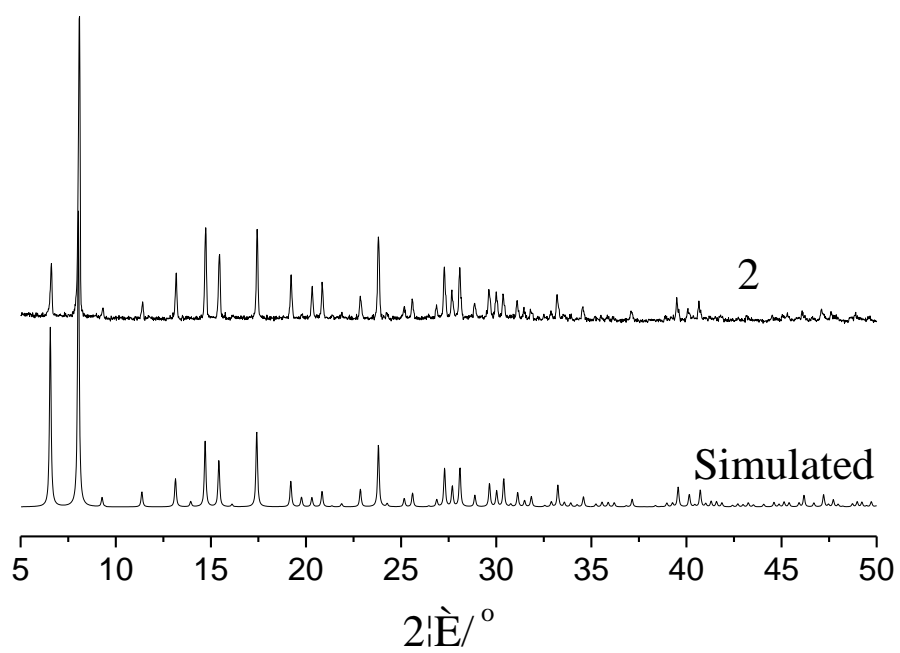

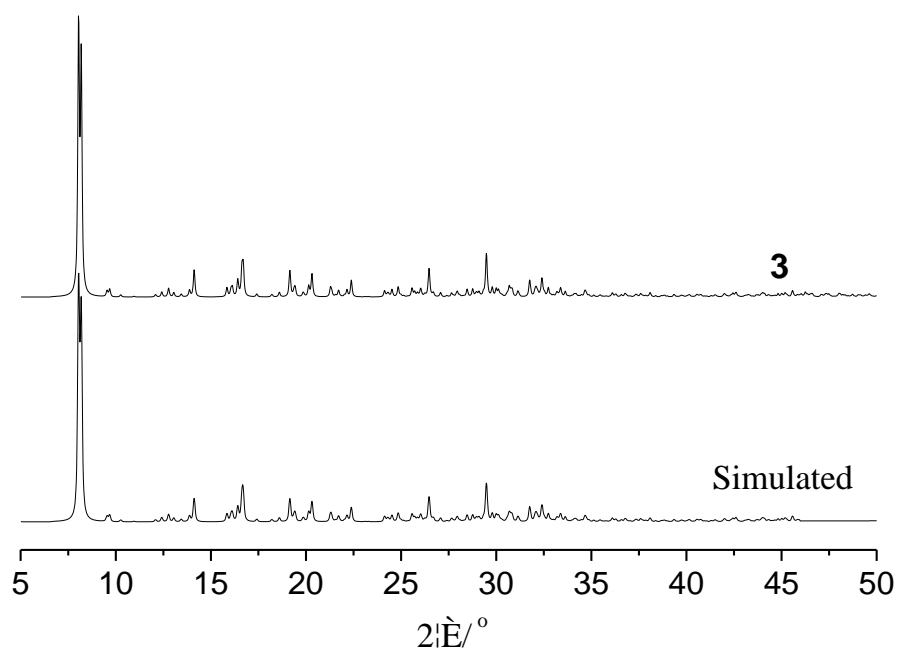

Fig. S4 Simulated and experimental powder XRD patterns of **1 - 3**.

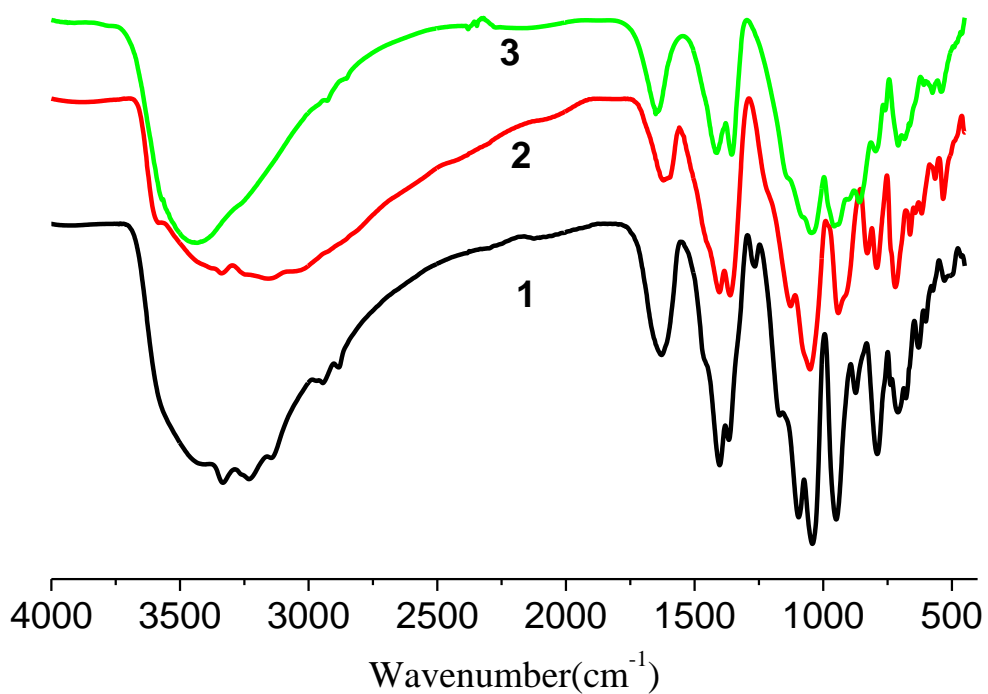

Fig. S5 IR spectra of **1-2**.

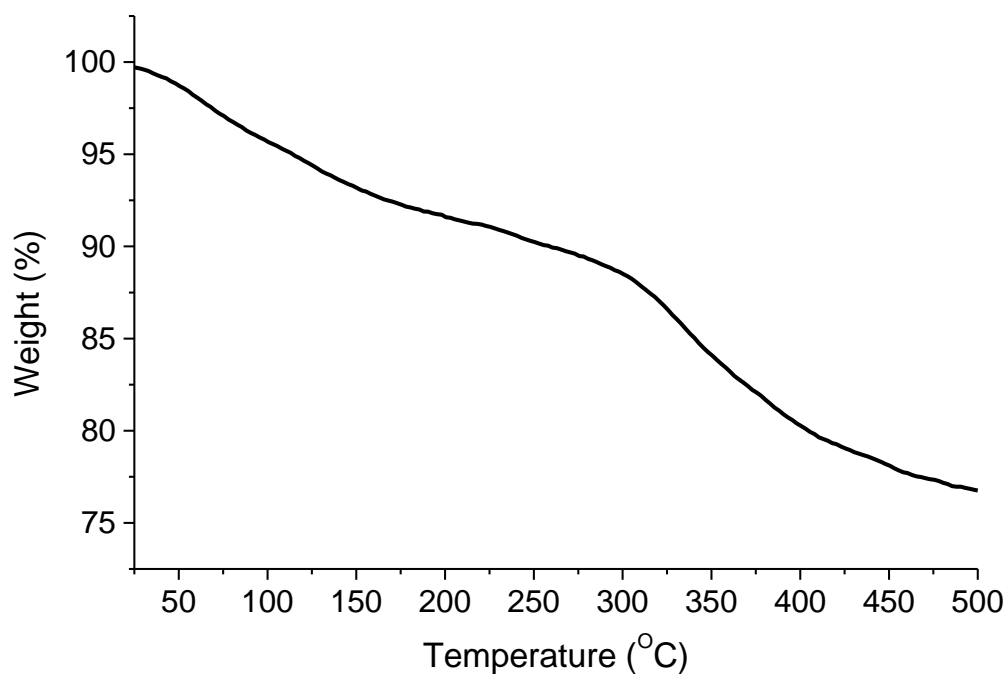

Fig. S6 TG curve of **1**.

As shown in Fig. S6, a two-step weight loss occurs in the range of 25-475 °C which is related to the removal of H<sub>2</sub>O molecules, -OH groups and the dien ligands (found, 23.6 %; calcd, 24.2 %).
